# Supplementary material for: Eliminating a global regulator of carbon catabolite repression enhances the conversion of aromatic lignin monomers to muconate in Pseudomonas putida KT2440
Source: PubMed Central journal article supplement — Metab Eng Commun. 2017 May 31;5:19–25. doi: 10.1016/j.meteno.2017.05.002 (PMC5699531; doi:10.1016/j.meteno.2017.05.002), 2017-05-31
Supplement: mmc1.pdf [file mmc1.pdf]

# Eliminating a global regulator of carbon catabolite repression enhances the conversion of aromatic lignin monomers to muconate in *Pseudomonas putida* KT2440

Christopher W. Johnson<sup>a</sup>, Paul E. Abraham<sup>b</sup>, Jeffrey G. Linger<sup>a</sup>, Payal Khanna, Robert L. Hettich<sup>b</sup>, Gregg T. Beckham<sup>a\*</sup>

<sup>a</sup> National Bioenergy Center, National Renewable Energy Laboratory, Golden, CO 80401, United States

<sup>b</sup> Chemical Sciences Division, Oak Ridge National Laboratory, Oak Ridge, TN 37831, United States

\*Corresponding Author Information: [gregg.beckham@nrel.gov](mailto:gregg.beckham@nrel.gov); +01-303-384-7806

## SUPPLEMENTAL INFORMATION

Table S1. Normalized protein abundances for proteins involved in the metabolism of *p*-coumarate, ferulate, and benzoate identified by mass spectrometry-based proteomics. Null values are represented as zeros. The following proteins were not identified: CatB (Q88GK6), CatC (Q88GK7), CatR (Q88GK5), PcaF (Q88N39), PcaG (Q88E13), PcaH (Q88E12), PcaI (Q88FX5), PcaK (Q88N40), PcaP (Q88N34), PcaT (Q88N38), PobR (Q88H27), VanK (Q88GI3), and VanP (A0A140FWI0). Each abundance represents the average of measurements from biological triplicates.

| Protein name                  | CatA                                                             | CatA2      | Ech        | Fcs        | PcaB       | PcaC       | PcaD       | PcaJ       | PcaQ       | PcaR    | PobA    | VanA    | VanB    | VanR     | Vdh     |         |
|-------------------------------|------------------------------------------------------------------|------------|------------|------------|------------|------------|------------|------------|------------|---------|---------|---------|---------|----------|---------|---------|
| UniProt Accession             | Q88GK6                                                           | Q88I35     | Q88HJ8     | Q88HK0     | Q88N37     | Q88N35     | Q88N36     | POA101     | Q88M61     | Q88N41  | Q88H28  | Q88GI6  | Q88GI5  | Q88GI4   | Q88HJ9  |         |
| Glucose + <i>p</i> -coumarate | KT244-CJ102 Normalized protein abundance                         | 181101     | 7524.51    | 749272     | 239939     | 2150.6     | 373.756    | 2228.19    | 110.403    | 380.396 | 1982.77 | 32198.9 | 0       | 0        | 2553.09 | 695226  |
|                               | KT244-CJ102 Standard deviation                                   | 6881.02217 | 2179.8379  | 179977.399 | 15955.1497 | 218.24533  | 647.364382 | 1369.07704 | 191.223605 | 658.865 | 860.829 | 1608.4  | 0       | 0        | 2891.07 | 35601.3 |
|                               | KT2440-CJ238 ( <i>Δ</i> <i>cr</i> ) Normalized protein abundance | 264347     | 7899.63    | 751398     | 334719     | 2774.77    | 62.5761    | 4095.55    | 105.907    | 259.855 | 1240.31 | 92618.8 | 58.9326 | 530.261  | 4078.13 | 666106  |
|                               | KT2440-CJ238 ( <i>Δ</i> <i>cr</i> ) Standard deviation           | 21997.3917 | 5354.4099  | 96375.1174 | 6650.79797 | 908.942159 | 108.384985 | 3160.81952 | 183.436305 | 450.082 | 967.291 | 27260.4 | 102.074 | 623.1    | 1863.63 | 83040.2 |
|                               | Student's T-test p-value                                         | 0.0019     | 0.7683     | 0.9231     | 0.0011     | 0.3045     | 0.8466     | 0.7170     | 0.9961     | 0.9702  | 0.3033  | 0.0034  | 0.3739  | 0.0012   | 0.3151  | 0.5779  |
|                               | Fold change                                                      | 1.4571     | 1.2124     | 1.0157     | 1.3969     | 1.2513     | 1.8144     | 1.4384     | 1.0140     | 1.1355  | 1.8896  | 2.8012  | 5.4843  | 301.8903 | 2.2513  | 1.0482  |
| Glucose + ferulate            | KT244-CJ102 Normalized protein abundance                         | 213162     | 6005.62    | 671040     | 309677     | 2612.12    | 587.698    | 2694.92    | 0          | 14.8342 | 677.858 | 0       | 26909.4 | 31986.6  | 8550.03 | 742732  |
|                               | KT244-CJ102 Standard deviation                                   | 18462.9688 | 4349.69919 | 116930.75  | 41846.6939 | 2647.28377 | 749.517274 | 1239.6686  | 0          | 25.6936 | 744.034 | 0       | 3569.27 | 6455.09  | 7922    | 128567  |
|                               | KT2440-CJ238 ( <i>Δ</i> <i>cr</i> ) Normalized protein abundance | 244111     | 5558.19    | 473205     | 232349     | 10218.7    | 1088.58    | 3249.42    | 131.709    | 400.785 | 542.94  | 0       | 57584.5 | 41682.9  | 5320.02 | 478433  |
|                               | KT2440-CJ238 ( <i>Δ</i> <i>cr</i> ) Standard deviation           | 60375.6538 | 3472.65795 | 43757.146  | 22625.2601 | 13974.134  | 1006.27129 | 275.543303 | 160.507589 | 694.18  | 198.713 | 0       | 19977.1 | 10995.3  | 5313.55 | 93111.6 |
|                               | Student's T-test p-value                                         | 0.4925     | 0.9680     | 0.0454     | 0.0416     | 0.3900     | 0.8729     | 0.4111     | 0.1227     | 0.6997  | 0.7546  | 0.0000  | 0.0421  | 0.2833   | 0.6207  | 0.0476  |
|                               | Fold change                                                      | 1.1240     | 1.0323     | 1.4065     | 1.3289     | 2.6336     | 1.7500     | 1.2971     | 28.3879    | 3.0007  | 1.3346  | 0       | 2.0497  | 1.2895   | 2.0333  | 1.5571  |
| Acetate + <i>p</i> -coumarate | KT244-CJ102 Normalized protein abundance                         | 269409     | 5408.03    | 1010000    | 361233     | 3683.66    | 3861.73    | 5780.59    | 218.284    | 1741.74 | 1539.72 | 60345.1 | 4455.83 | 3905.39  | 4597.54 | 1042020 |
|                               | KT244-CJ102 Standard deviation                                   | 70715.4776 | 4049.41354 | 228085.111 | 22465.3918 | 808.005166 | 4869.01999 | 2254.61054 | 193.090756 | 1511.76 | 1122.9  | 9594.73 | 7717.72 | 6764.33  | 3251.15 | 151795  |
|                               | KT2440-CJ238 ( <i>Δ</i> <i>cr</i> ) Normalized protein abundance | 410079     | 10676.6    | 1049220    | 442543     | 15041.8    | 3513.55    | 7259.65    | 536.554    | 716.036 | 1309.95 | 129994  | 0       | 16.6634  | 8940.97 | 1022280 |
|                               | KT2440-CJ238 ( <i>Δ</i> <i>cr</i> ) Standard deviation           | 61848.9363 | 1042.68766 | 28212.5096 | 44662.8353 | 16384.9408 | 1683.084   | 2038.7104  | 95.2233037 | 1162.11 | 689.884 | 12896.7 | 0       | 28.8619  | 1702.04 | 106729  |
|                               | Student's T-test p-value                                         | 0.0784     | 0.1032     | 0.7074     | 0.0427     | 0.1722     | 0.4424     | 0.4321     | 0.2780     | 0.7425  | 0.8955  | 0.0021  | 0.3739  | 0.6164   | 0.1866  | 0.8912  |
|                               | Fold change                                                      | 1.5494     | 2.3348     | 1.0580     | 1.2224     | 2.8032     | 11.2155    | 1.2789     | 10.9655    | 3.3118  | 1.1108  | 2.1656  | 23.1908 | 6.1655   | 2.4710  | 1.0157  |
| Acetate + ferulate            | KT244-CJ102 Normalized protein abundance                         | 299716     | 11980.2    | 702421     | 345183     | 3543.66    | 587.231    | 4983.02    | 334.419    | 3223.47 | 1313.93 | 7127.46 | 40000.2 | 22532.1  | 4800.81 | 840751  |
|                               | KT244-CJ102 Standard deviation                                   | 364096     | 17428      | 812696     | 349222     | 5063.91    | 11668.3    | 5794.48    | 353.494    | 1255.41 | 1235.75 | 694.438 | 93628.8 | 52254.2  | 2965.78 | 923119  |
|                               | KT2440-CJ238 ( <i>Δ</i> <i>cr</i> ) Normalized protein abundance | 36724.8465 | 4720.15022 | 52479.2342 | 7420.00174 | 1762.84667 | 518.272903 | 1187.80444 | 295.643752 | 5327.11 | 893.447 | 12345.1 | 6691.74 | 8222.18  | 2917.43 | 86606.7 |
|                               | KT2440-CJ238 ( <i>Δ</i> <i>cr</i> ) Standard deviation           | 73463.0297 | 9475.01074 | 154210.546 | 63193.1809 | 1541.86816 | 12977.0096 | 1952.97389 | 334.999411 | 2174.43 | 1467.42 | 915.361 | 14550.3 | 10847.7  | 3179.59 | 126679  |
|                               | Student's T-test p-value                                         | 0.2403     | 0.4154     | 0.3299     | 0.9921     | 0.3356     | 0.0371     | 0.6311     | 0.9951     | 0.5965  | 0.7297  | 0.7977  | 0.0030  | 0.0190   | 0.4445  | 0.4198  |
|                               | Fold change                                                      | 1.2048     | 1.4096     | 1.1445     | 1.0011     | 1.5205     | 15.4467    | 1.1361     | 1.0192     | 8.8461  | 1.4001  | 2.9839  | 2.3453  | 2.3835   | 1.9993  | 1.0946  |

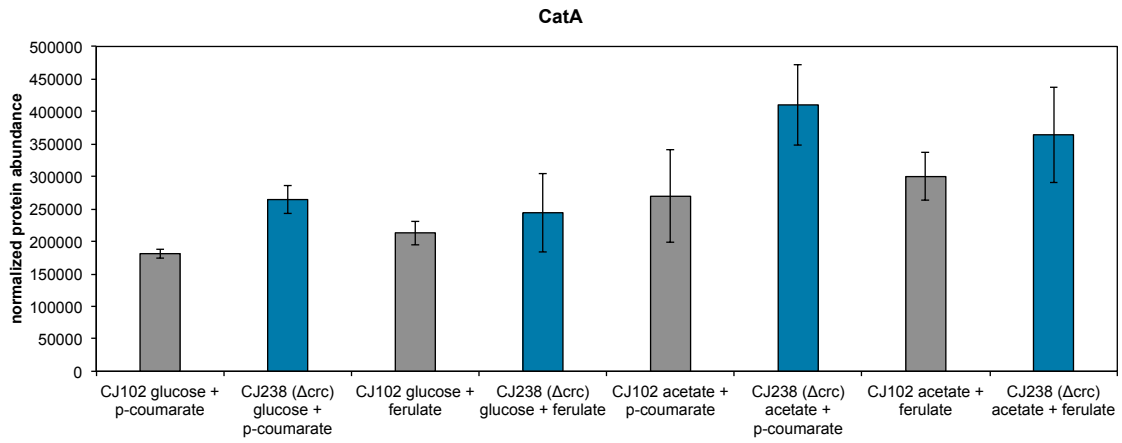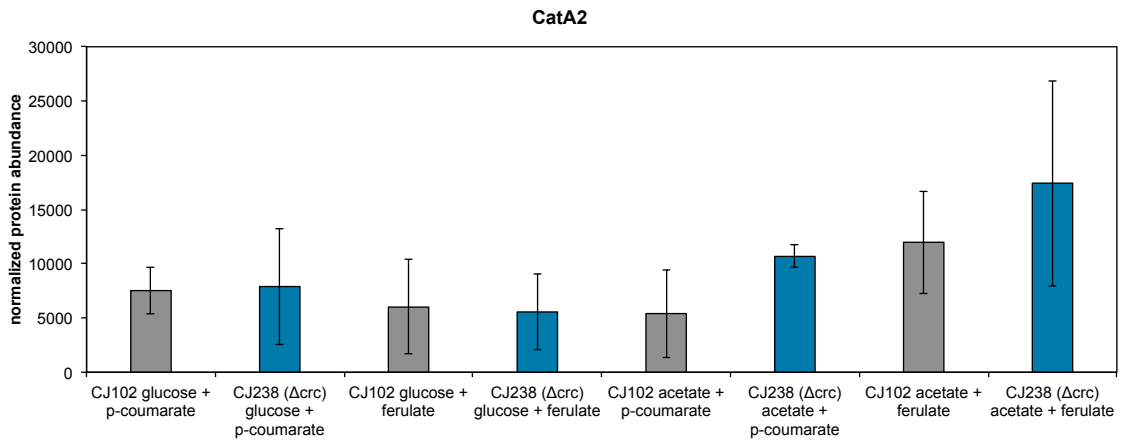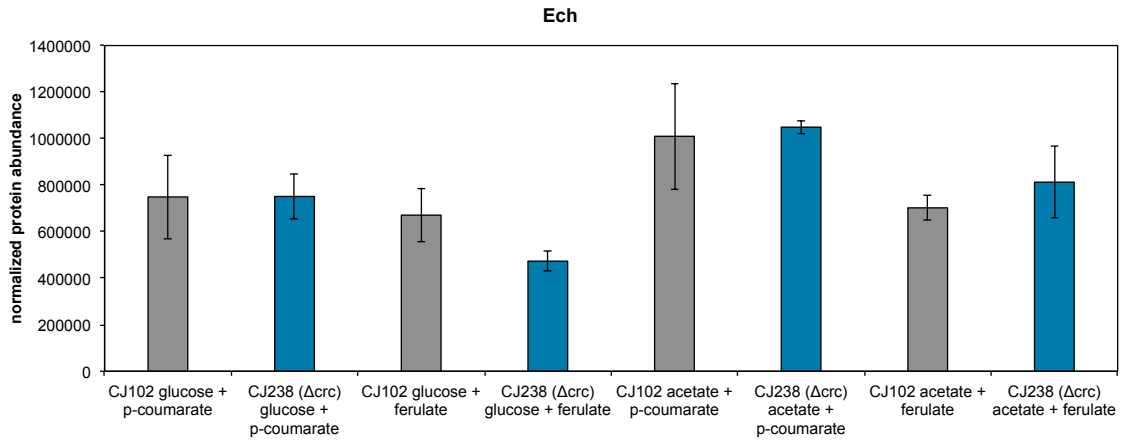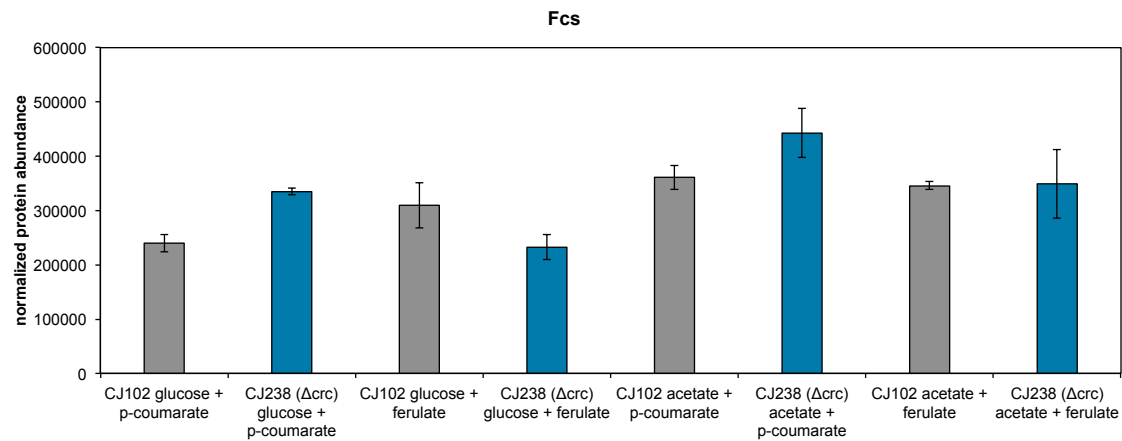

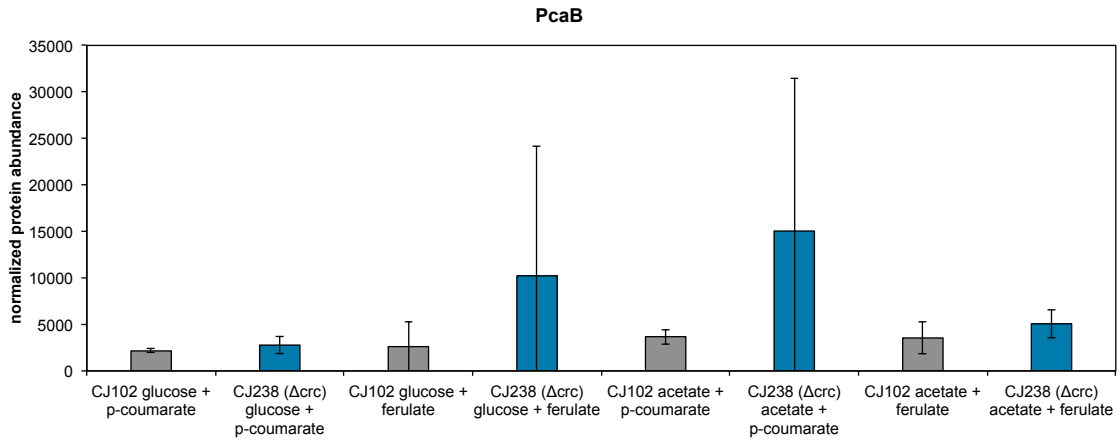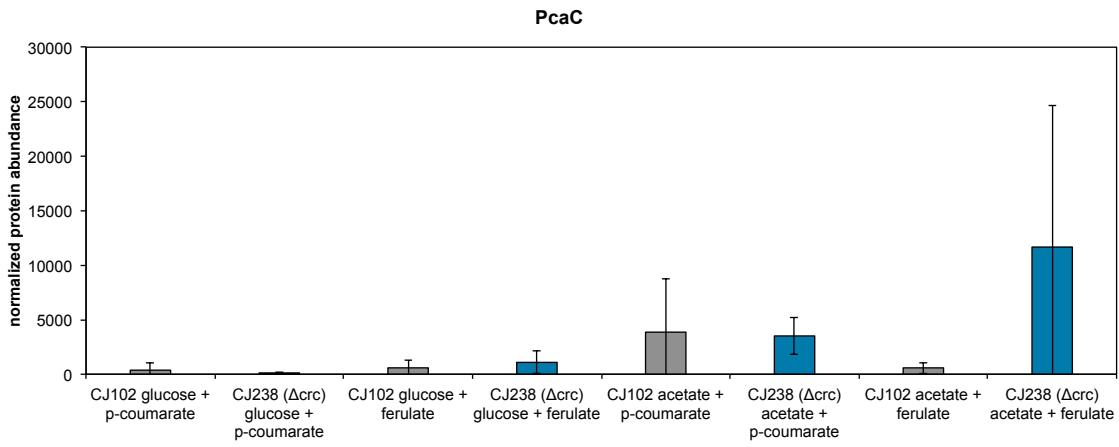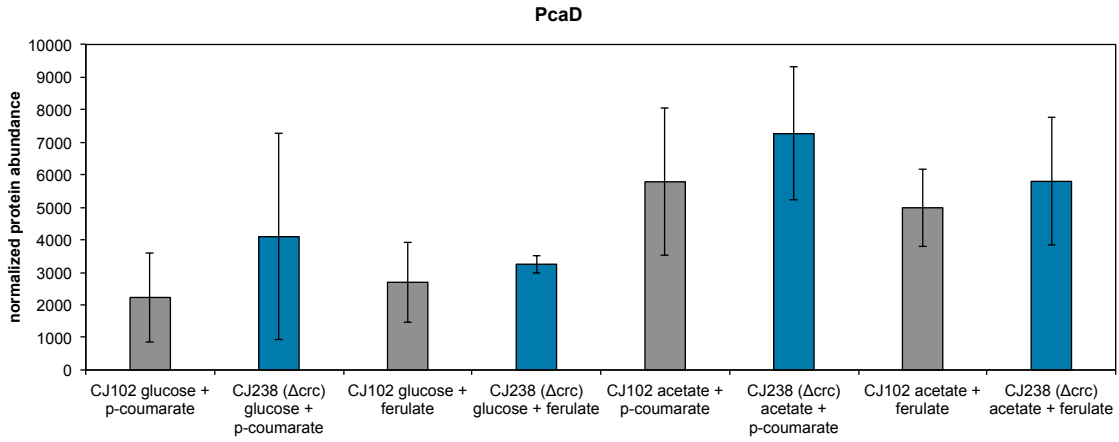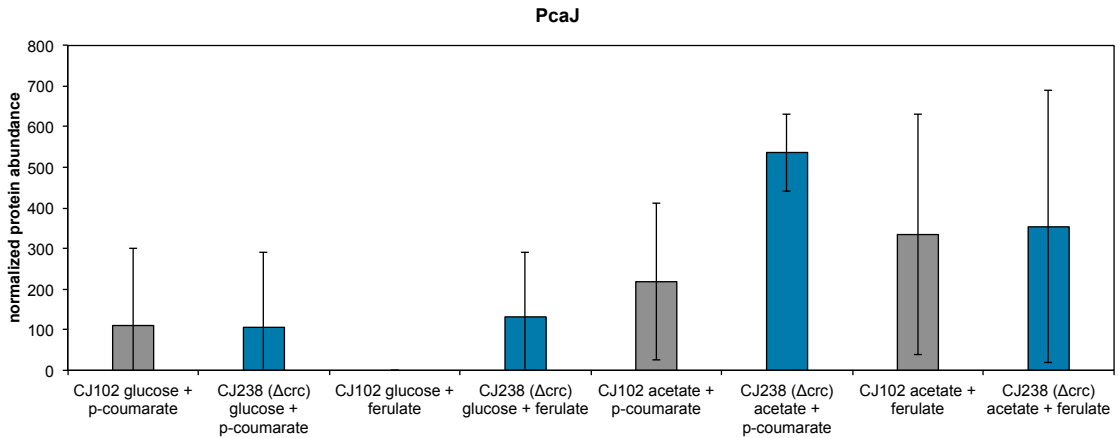

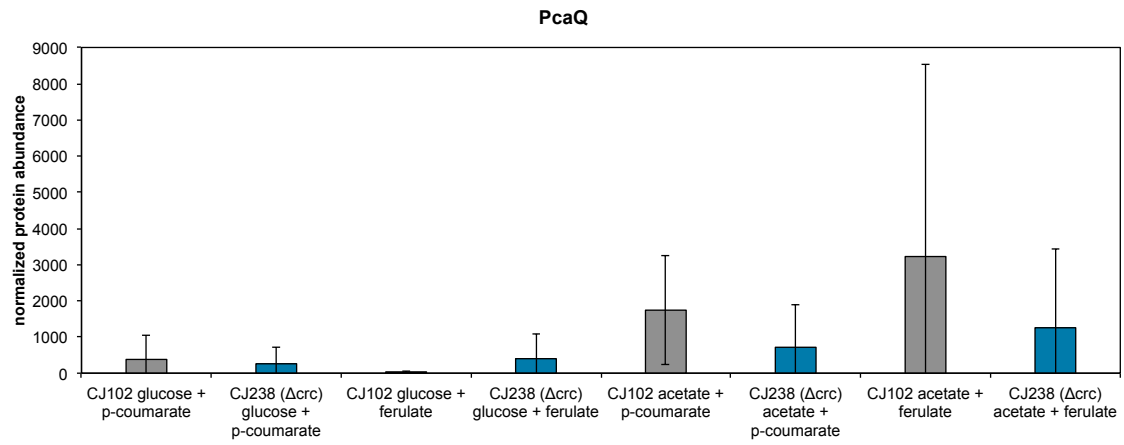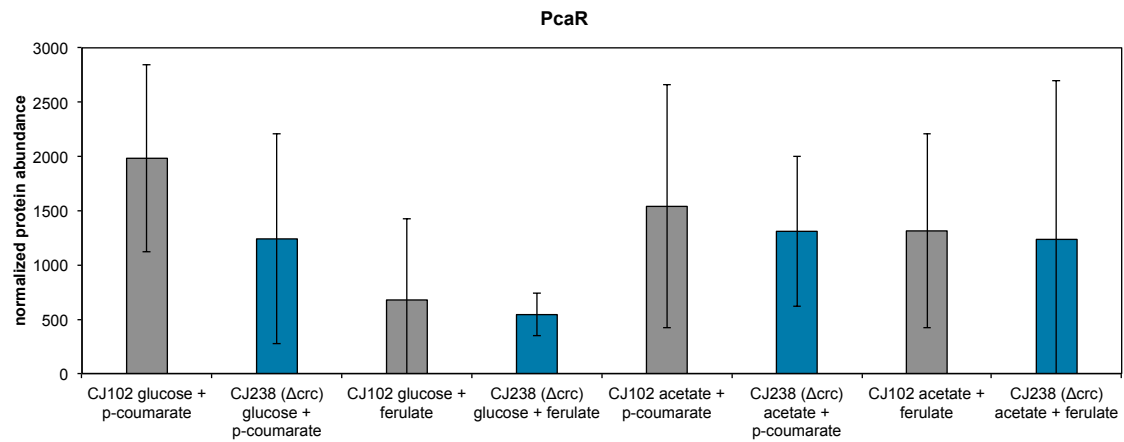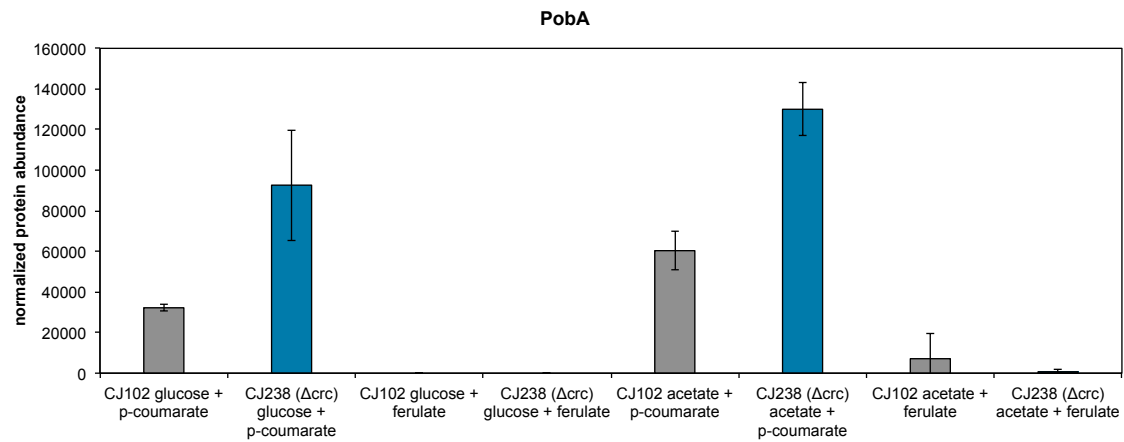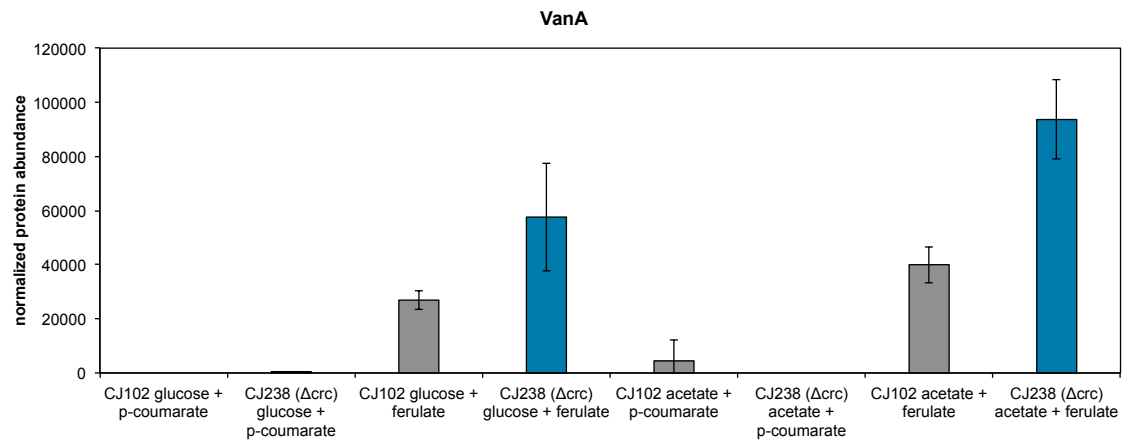

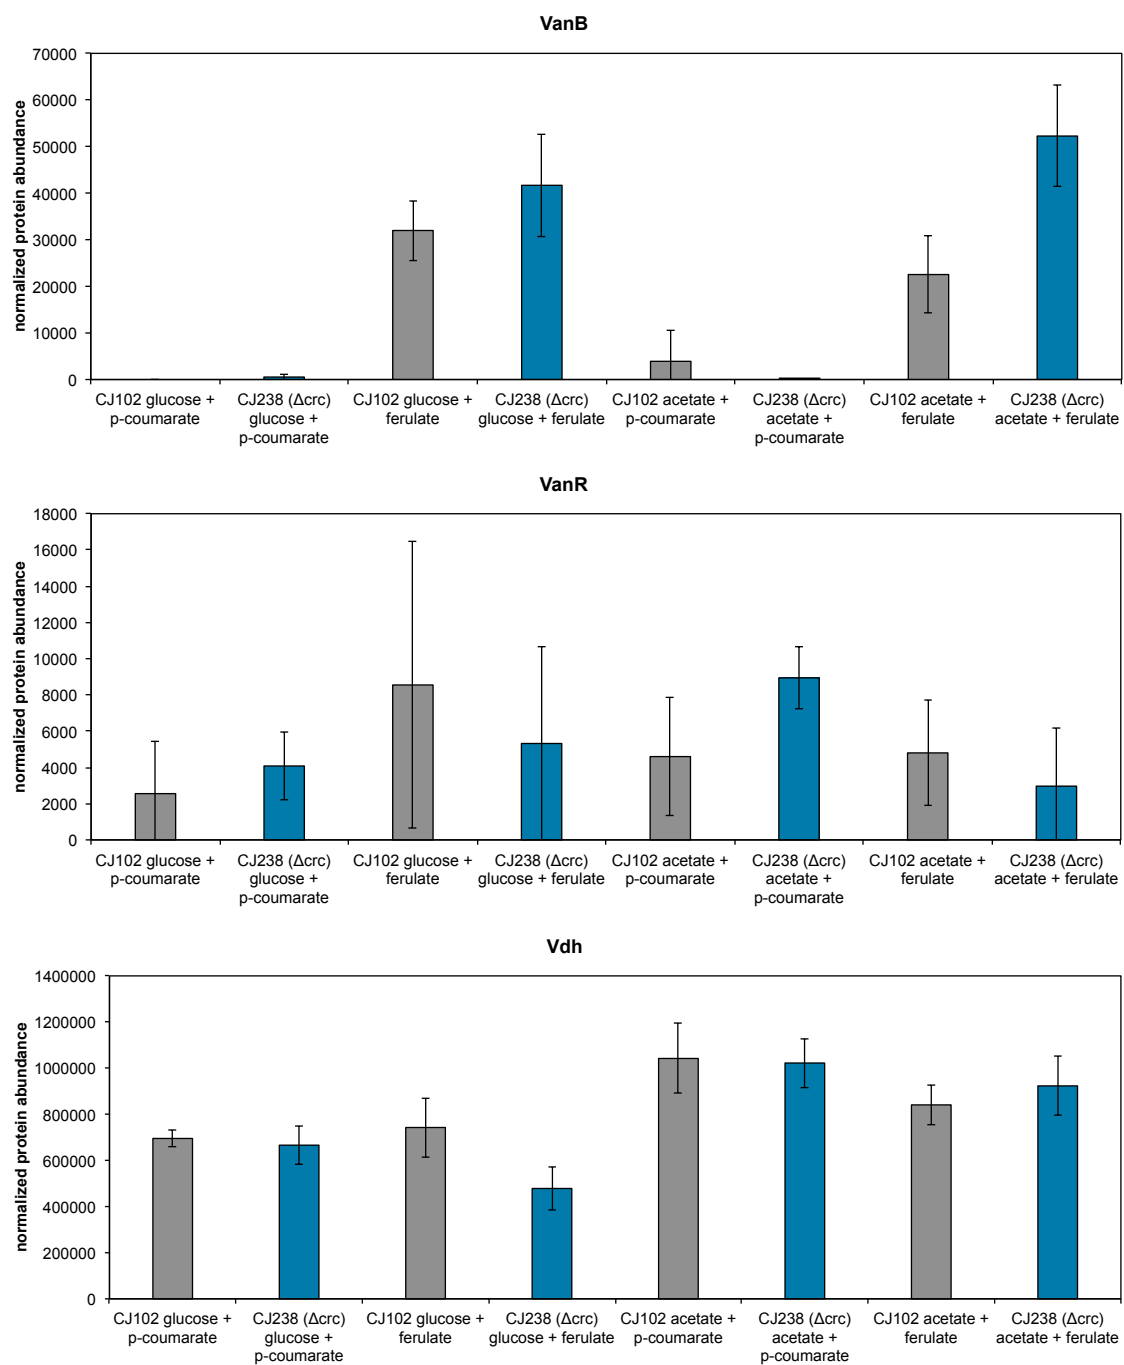

Fig. S1. Graphs of normalized protein abundances in Table S1. Error bars represent the standard deviation of measurements from biological triplicates.
